# Supplementary material
Source: Royal Society of Chemistry journal article supplement (doi:10.1039/d6cc01339b)
Supplement: d6cc01339b1.pdf [file d6cc01339b1.pdf]

*Supporting Information (SI)*

**Distinct Roles of Te and Mo in Modulating the Activity and Selectivity of  
CO<sub>2</sub> Hydrogenation to Ethanol over CoFe catalyst**

Zihan Zhao<sup>a</sup>, Yan Shao<sup>b</sup>, Zongliang Kou<sup>\*ac</sup> and Huanhao Chen<sup>\*ac</sup>

<sup>a</sup>*State Key Laboratory of Materials-Oriented Chemical Engineering, College of Chemical Engineering, Nanjing  
Tech University, Nanjing 211816, China*

<sup>b</sup>*School of Environmental Science and Engineering, Nanjing Tech University, Nanjing, 211816, PR China*

<sup>c</sup>*Quzhou Membrane material innovation institute, Quzhou, 324000, China*

\*Corresponding authors' e-mail: [UniqueKZL@163.com](mailto:UniqueKZL@163.com) (Z.K.); [h.chen@njtech.edu.cn](mailto:h.chen@njtech.edu.cn) (H.C.)

## Methods

### Synthesis of catalysts

All chemical reagents were of analytical grade and used as received without further purification. Ultrapure water was used throughout all experimental procedures.

In a typical synthesis, an aqueous precursor solution was prepared by dissolving  $\text{Co}(\text{NO}_3)_2 \cdot 6\text{H}_2\text{O}$  (1.02 g, Sigma-Aldrich,  $\geq 99.99\%$ ) and  $\text{Fe}(\text{NO}_3)_3 \cdot 9\text{H}_2\text{O}$  (5.79 g, Sigma-Aldrich,  $\geq 99.99\%$ ) in 100 mL of deionized water. Under continuous stirring, an alkaline precipitating agent—consisting of a 1:1 mass ratio of  $\text{Na}_2\text{CO}_3$  to  $\text{NaOH}$ —was added dropwise to the metal salt solution while maintaining the pH at 9. The resulting suspension was aged at  $80\text{ }^\circ\text{C}$  for 30 min. The solid product was collected by high-pressure filtration, thoroughly washed with deionized water (1 L), and dried at  $80\text{ }^\circ\text{C}$ . The obtained precursor was then calcined at  $500\text{ }^\circ\text{C}$  for 4 h in static air. A series of cobalt-iron oxides with varying Co/Fe mass ratios were synthesized following the co-precipitation procedure described above. For clarity, the baseline catalyst with a cobalt-to-iron mass ratio of 1:4 is hereafter denoted as CoFe.

Mo- or Te-modified catalysts were prepared via an incipient wetness impregnation method. Typically, a calculated volume of an aqueous solution of molybdenum nitrate or tellurium nitrate was added dropwise to the as-prepared CoFe support. The mixture was stirred continuously for 12 h at room temperature and subsequently dried at  $80\text{ }^\circ\text{C}$  overnight to remove the solvent completely. The resulting solid was finally calcined at  $500\text{ }^\circ\text{C}$  for 4 h in static air. The obtained catalysts with different loadings are labeled as xM-CoFe, where M represents the dopant element (Mo or Te) and x denotes its nominal mass percentage ( $x = 0.5, 1, 1.5, \text{ or } 2$ ). For example, a catalyst impregnated with a solution corresponding to 0.5 wt% Te is designated as 0.5Te-CoFe.

### Catalyst evaluation

The  $\text{CO}_2$  hydrogenation performance was evaluated in a custom-built fixed-bed reactor constructed from stainless steel (6 mm internal diameter  $\times$  485 mm length). For each test, the catalytic bed was prepared by thoroughly mixing the pelletized catalyst (200 mg, sieved to 250–425  $\mu\text{m}$ ) with quartz sand (1 g, of matched particle size) to ensure uniform flow distribution and temperature profile within the isothermal zone of the reactor. Prior to the reaction, the catalyst was activated via *in situ* reduction under pure  $\text{H}_2$  flow ( $50\text{ mL min}^{-1}$ ) at  $350\text{ }^\circ\text{C}$  for 1 h. After reduction, the reactor temperature was adjusted to the target reaction temperature of  $260\text{ }^\circ\text{C}$  under  $\text{N}_2$  flow. The reactant gas mixture ( $\text{H}_2/\text{CO}_2/\text{N}_2 = 3:1:1$  molar ratio) was then introduced at a total flow rate of  $20\text{ mL min}^{-1}$ , corresponding to a gas hourly space velocity (GHSV) of  $6,000\text{ mL g}_{\text{cat}}^{-1}\text{ h}^{-1}$ . The system pressure was subsequently raised to 5 MPa using a back-pressure regulator.

To prevent condensation of heavy products, all downstream transfer lines were maintained at  $130\text{ }^\circ\text{C}$  with digitally controlled heating tape. The effluent gas composition was analyzed online using an Agilent 8860 gas chromatograph equipped with an HP-PLOT/Q column and both FID and TCD detectors. Data were collected continuously until reaction steady state was reached, which was confirmed by stable product composition over time. Carbon balances during steady-state operation ranged between 98% and 102%. Key performance metrics—including  $\text{CO}_2$  conversion ( $X_{\text{CO}_2}$ , %), product selectivity ( $S_i$ , %) and space-time yield of product ( $STY_i$ ,  $\text{g}_i\text{ kg}_{\text{cat}}^{-1}\text{ h}^{-1}$ ) were calculated according to Equations 1–3 provided below.

$$X_{\text{CO}_2} = \frac{F_{\text{CO}_2,\text{in}} - F_{\text{CO}_2,\text{out}}}{F_{\text{CO}_2,\text{in}}} \times 100 \quad (1)$$

$$S_i (\%) = \frac{F_{i,\text{out}}}{\sum F_{i,\text{out}}} \times 100 \quad (2)$$

$$STY_i (\text{g}_i\text{ kg}_{\text{cat}}^{-1}\text{ h}^{-1}) = \frac{F_{\text{CO}_2,\text{in}} \times X_{\text{CO}_2} \times S_i \times M_i \times 3600}{m_{\text{cat}}} \times 100 \quad (3)$$

where  $F$  ( $\text{mol s}^{-1}$ ) denotes the molar flow rate of reactants and products,  $m_{\text{cat}}$  (g) is the weight of the catalyst, and  $M_{\text{EtOH}}$  ( $46\text{ g mol}^{-1}$ ) is the molar mass of Ethanol.

**Characterizations.** The chemical composition and structural properties of the synthesized CoFe, 0.5Mo-CoFe, and 0.5Te-CoFe catalysts were systematically characterized using a suite of analytical techniques. The actual metal loadings of Co, Fe, Mo, and Te in the catalysts were determined by Inductively Coupled Plasma-Optical Emission Spectroscopy (ICP-OES, Agilent 720). Morphological and elemental distribution analyses were performed using High-Resolution Transmission Electron Microscopy (HRTEM), High-Angle Annular Dark-Field Scanning TEM (HAADF-STEM), and Energy-Dispersive X-ray Spectroscopy (EDS) mapping. These analyses were conducted on a JEOL JEM-2100F electron microscope operating at 200 kV, equipped with both HAADF and Super-X EDS detectors. Further atomic-resolution HAADF-STEM imaging and EDS mapping of the reduced catalysts were obtained using a Thermo Fisher Scientific Titan G2 microscope, also operating at 200 kV.

**X-ray Photoelectron Spectroscopy (XPS).** The surface chemical states of the catalysts were investigated by X-ray Photoelectron Spectroscopy (XPS) on a Thermo Fisher ESCALAB 250XI spectrometer. All binding energies were calibrated relative to the C 1s peak at 284.8 eV. For the reduced samples, *in situ* pre-reduction treatment was carried out at 350 °C under a pure H<sub>2</sub> flow (50 mL min<sup>-1</sup>) in a pretreatment chamber connected to the XPS analysis chamber, ensuring no exposure to air before measurement.

**X-ray Absorption Fine Structure (XAFS).** The local coordination environment and electronic structure of the Co and Fe atoms were probed by static X-ray Absorption Fine Structure (XAFS) spectroscopy at the Co *K*-edge and Fe *K*-edge. Measurements were conducted on a laboratory-based XAFS spectrometer (Rapid XAFS 2M, Anhui Absorption Spectroscopy Analysis Instrument Co., Ltd.) using a Mo target X-ray source operated at 20 kV and 20 mA. A Si (553) spherically bent crystal analyzer (SBCA) with a 500 mm radius of curvature was used as the monochromator. The XAFS data were collected in transmission mode using a silicon drift detector (SDD). The energy calibration for each measurement was performed using a corresponding Co or Fe metal foil, and all data were collected within a single, continuous period to ensure consistency.

**H<sub>2</sub>-TPR measurements.** Reduction behaviors and surface adsorption properties were evaluated by chemisorption measurements on a BELCAT II instrument equipped with a Thermal Conductivity Detector (TCD). For H<sub>2</sub> Temperature-Programmed Reduction (H<sub>2</sub>-TPR), approximately 30 mg of catalyst was pretreated in an Ar flow at 350 °C for 1 h to remove surface contaminants. The TPR profile was then recorded from 50 to 850 °C under a 10 vol% H<sub>2</sub>/Ar flow at a heating rate of 10 °C min<sup>-1</sup>.

**CO<sub>2</sub> Temperature-Programmed Desorption (CO<sub>2</sub>-TPD).** Approximately 30 mg sample was first reduced *in situ* in a 10 vol% H<sub>2</sub>/Ar flow at 350 °C for 1 h. After cooling to 60 °C under He, the catalyst was saturated with a 10 vol% CO<sub>2</sub>/He flow for 1 h. Physically adsorbed CO<sub>2</sub> was then removed by purging with He, followed by programmed desorption from 60 to 850 °C in a He flow.

**CO Temperature-Programmed Desorption (CO-TPD).** Approximately 30 mg sample was first reduced *in situ* in a 10 vol% H<sub>2</sub>/Ar flow at 350 °C for 1 h. After cooling to 60 °C under He, the catalyst was saturated with a 10 vol% CO/He flow for 1 h. Physically adsorbed CO was then removed by purging with He, followed by programmed desorption from 60 to 850 °C in a He flow.

**Diffuse Reflectance Infrared Fourier Transform Spectroscopy (DRIFTS) using CO as a probe molecule (CO-DRIFTS).** Experiments were performed on a Thermo Scientific Nicolet iS50 FTIR spectrometer equipped with a Harrick DRIFTS cell and a liquid N<sub>2</sub>-cooled Mercury Cadmium Telluride (MCT) detector. Prior to measurement, catalysts were reduced *in situ* in H<sub>2</sub> flow at 350 °C for 1 h. After reduction, the system was cooled to 50 °C under Ar to collect a background spectrum. The catalysts were then exposed to a 2 vol% CO/Ar flow (50 mL min<sup>-1</sup>) at 50 °C and atmospheric pressure for 60 min. Subsequently, the gas phase and weakly adsorbed CO were removed by purging with pure Ar for an additional 60 min, while the DRIFTS spectra were continuously collected by averaging 64 scans at a resolution of 8 cm<sup>-1</sup>.

***In situ* Diffuse Reflectance Infrared Fourier Transform Spectroscopy (DRIFTS) using CO<sub>2</sub> as a probe molecule (CO<sub>2</sub>-DRIFTS).** Experiments were performed on a Thermo Scientific Nicolet iS50 FTIR spectrometer equipped with a Harrick DRIFTS cell and a liquid N<sub>2</sub>-cooled Mercury Cadmium Telluride (MCT) detector. Prior to measurement, catalysts were reduced *in situ* in H<sub>2</sub> flow at 350 °C for 1 h. Subsequently, the temperature was lowered to 260 °C to collect a background spectrum. *In situ* DRIFTS experiments were then performed at 3 MPa according to the following procedure: the catalysts were exposed to a reaction mixture of 10 vol% CO<sub>2</sub> (balanced with Ar) at a total flow rate of 50 mL min<sup>-1</sup> and 260 °C for 60 min. Subsequently, the gas phase and weakly adsorbed CO<sub>2</sub> were removed by purging with pure Ar for an additional 60 min, during which time the DRIFTS spectra were continuously collected by averaging 64 scans at a resolution of 8 cm<sup>-1</sup>.

***In situ* DRIFTS spectra of the CO<sub>2</sub>+H<sub>2</sub> reaction.** High-pressure *in situ* diffuse reflectance infrared Fourier transform spectroscopy (DRIFTS) coupled with mass spectrometry (MS) was further employed to investigate the surface reaction mechanisms of CO<sub>2</sub> hydrogenation over the developed catalysts. The experiments were conducted using a Thermo Scientific Nicolet iS50 FTIR spectrometer equipped with a Harrick Scientific DRIFTS cell and a liquid N<sub>2</sub>-cooled mercury cadmium telluride (MCT) detector, which was connected online to online mass spectrometer (Hidden QGA). Prior to each experiment, all catalysts were pre-reduced in a flow of 10 vol% H<sub>2</sub>/Ar at 350 °C for approximately 1 h. Subsequently, the temperature was lowered to 260 °C to collect a background spectrum. *In situ* DRIFTS experiments were then performed at 3 MPa according to the following procedure: the catalysts were exposed to a reaction mixture of 10 vol% CO<sub>2</sub> and 30 vol% H<sub>2</sub> (balanced with Ar) at a total flow rate of 50 mL min<sup>-1</sup> and 260 °C for 90 min. DRIFT spectra were recorded *in situ* by averaging 64 scans at a resolution of 8 cm<sup>-1</sup>. Throughout the measurements, the composition of the effluent gas was monitored in real time by MS. The monitored mass-to-charge (m/z) signals included H<sub>2</sub> (m/z = 2), CO<sub>2</sub> (m/z = 44), CO (m/z = 28), CH<sub>4</sub> (m/z = 16), CH<sub>3</sub>OH (m/z = 32), and C<sub>2</sub>H<sub>5</sub>OH (m/z = 46). This combined DRIFTS-MS approach enables the simultaneous observation of surface intermediates and gaseous products, thereby providing insights into the reaction pathways and kinetic behavior during CO<sub>2</sub> hydrogenation.

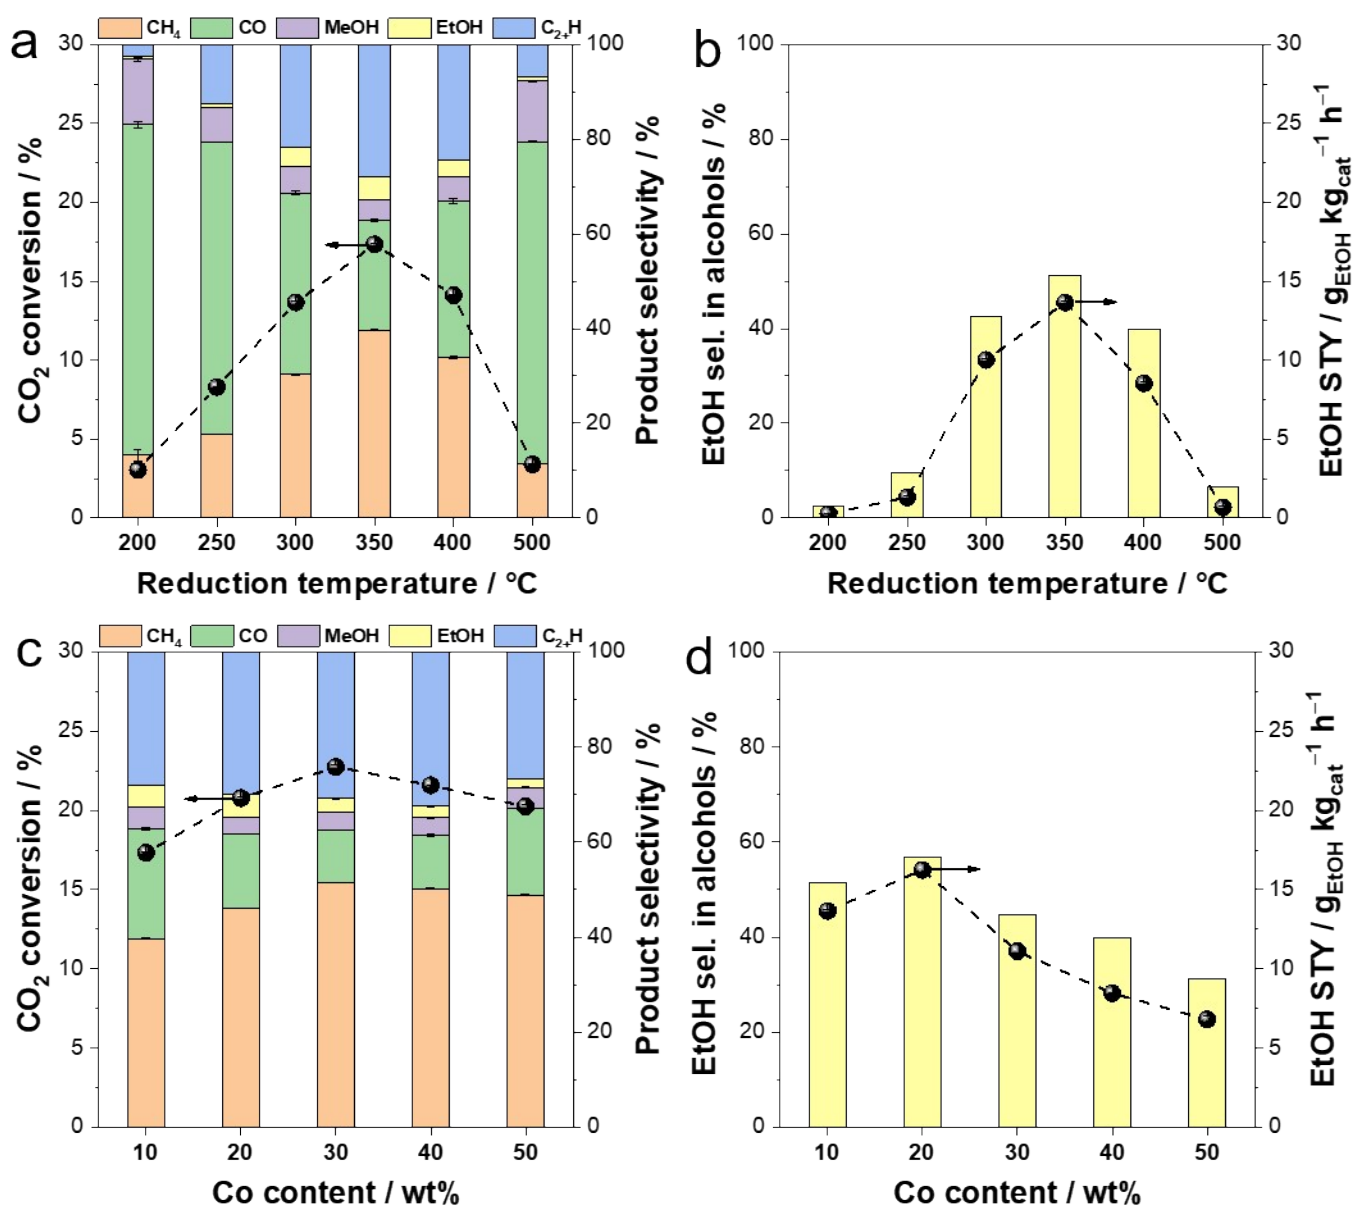

**Figure S1.** Catalytic performance of CO<sub>2</sub> hydrogenation over CoFe catalysts. (a, b) effect of Co content: (a) CO<sub>2</sub> conversion and product selectivity; (b) alcohols selectivity in liquid products and corresponding ethanol STY. (c, d) effect of reduction temperature: (c) CO<sub>2</sub> conversion and product selectivity; (d) alcohols selectivity in liquid products and corresponding ethanol STY. (Experimental conditions: T = 300 °C, P = 5.0 MPa, H<sub>2</sub>/CO<sub>2</sub>/N<sub>2</sub> = 3:1:1, and GHSV=6000 mL g<sub>cat</sub><sup>-1</sup> h<sup>-1</sup>).

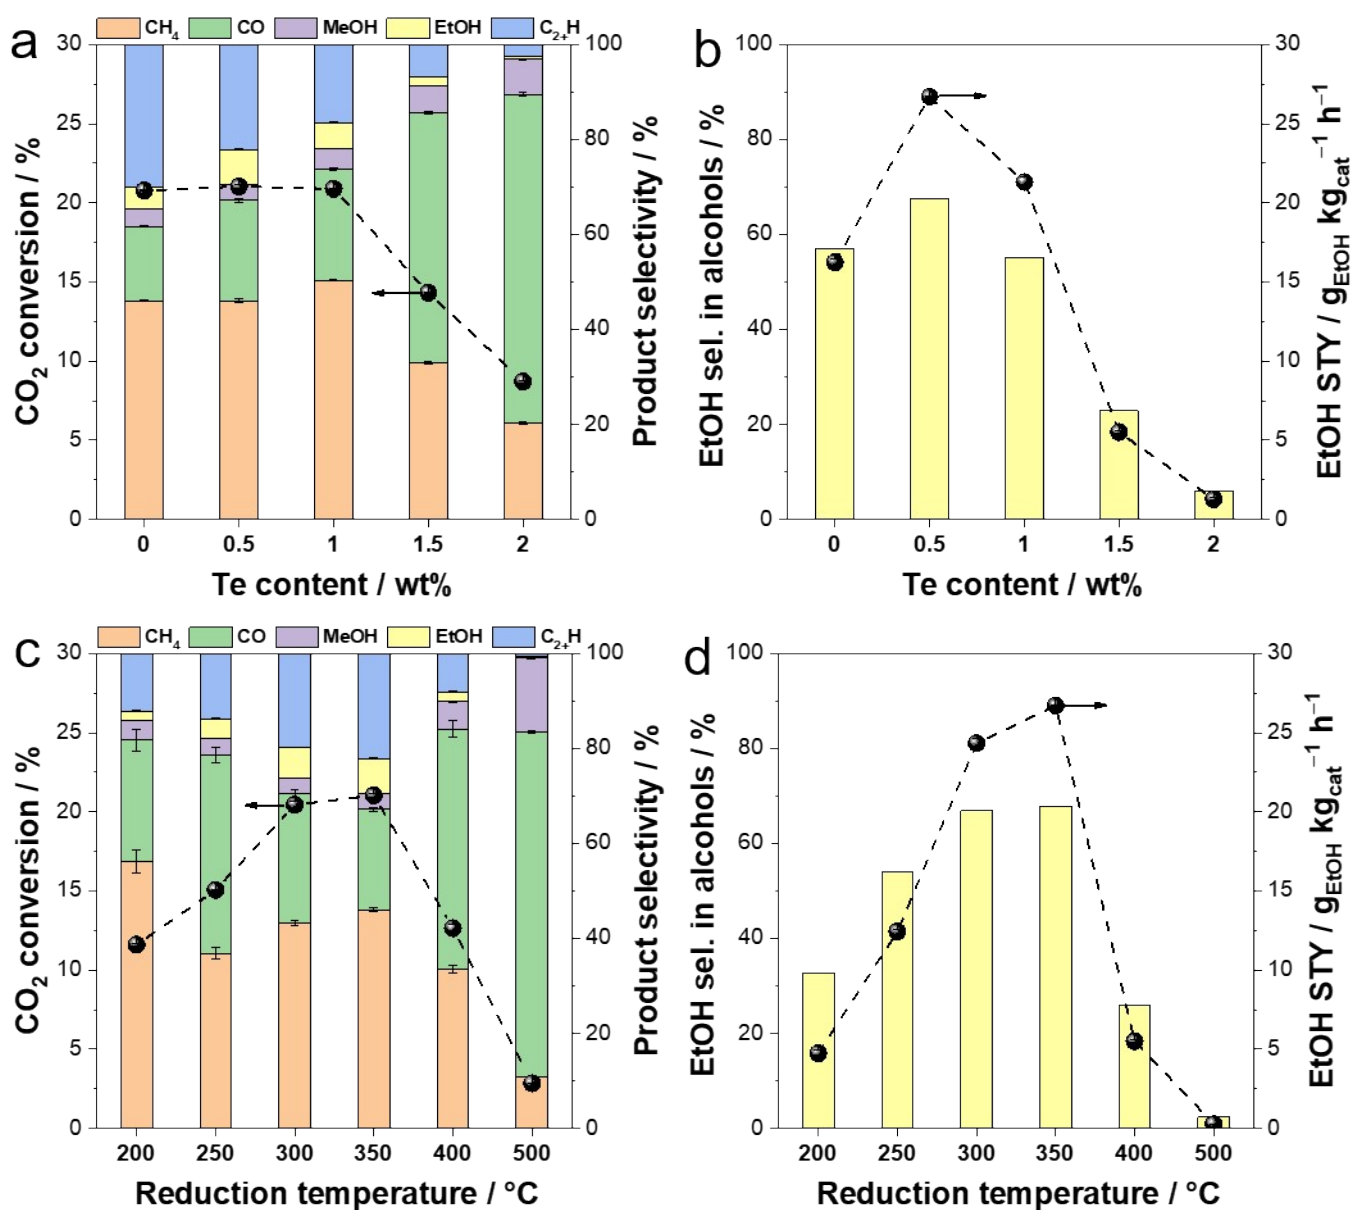

**Figure S2.** Catalytic performance of CO<sub>2</sub> hydrogenation over Te-CoFe catalysts. (a, b) effect of Co content: (a) CO<sub>2</sub> conversion and product selectivity; (b) alcohols selectivity in liquid products and corresponding ethanol STY. (c, d) effect of reduction temperature: (c) CO<sub>2</sub> conversion and product selectivity; (d) alcohols selectivity in liquid products and corresponding ethanol STY. (Experimental conditions: T = 300 °C, P = 5.0 MPa, H<sub>2</sub>/CO<sub>2</sub>/N<sub>2</sub> = 3:1:1, and GHSV=6000 mL g<sub>cat</sub><sup>-1</sup> h<sup>-1</sup>).

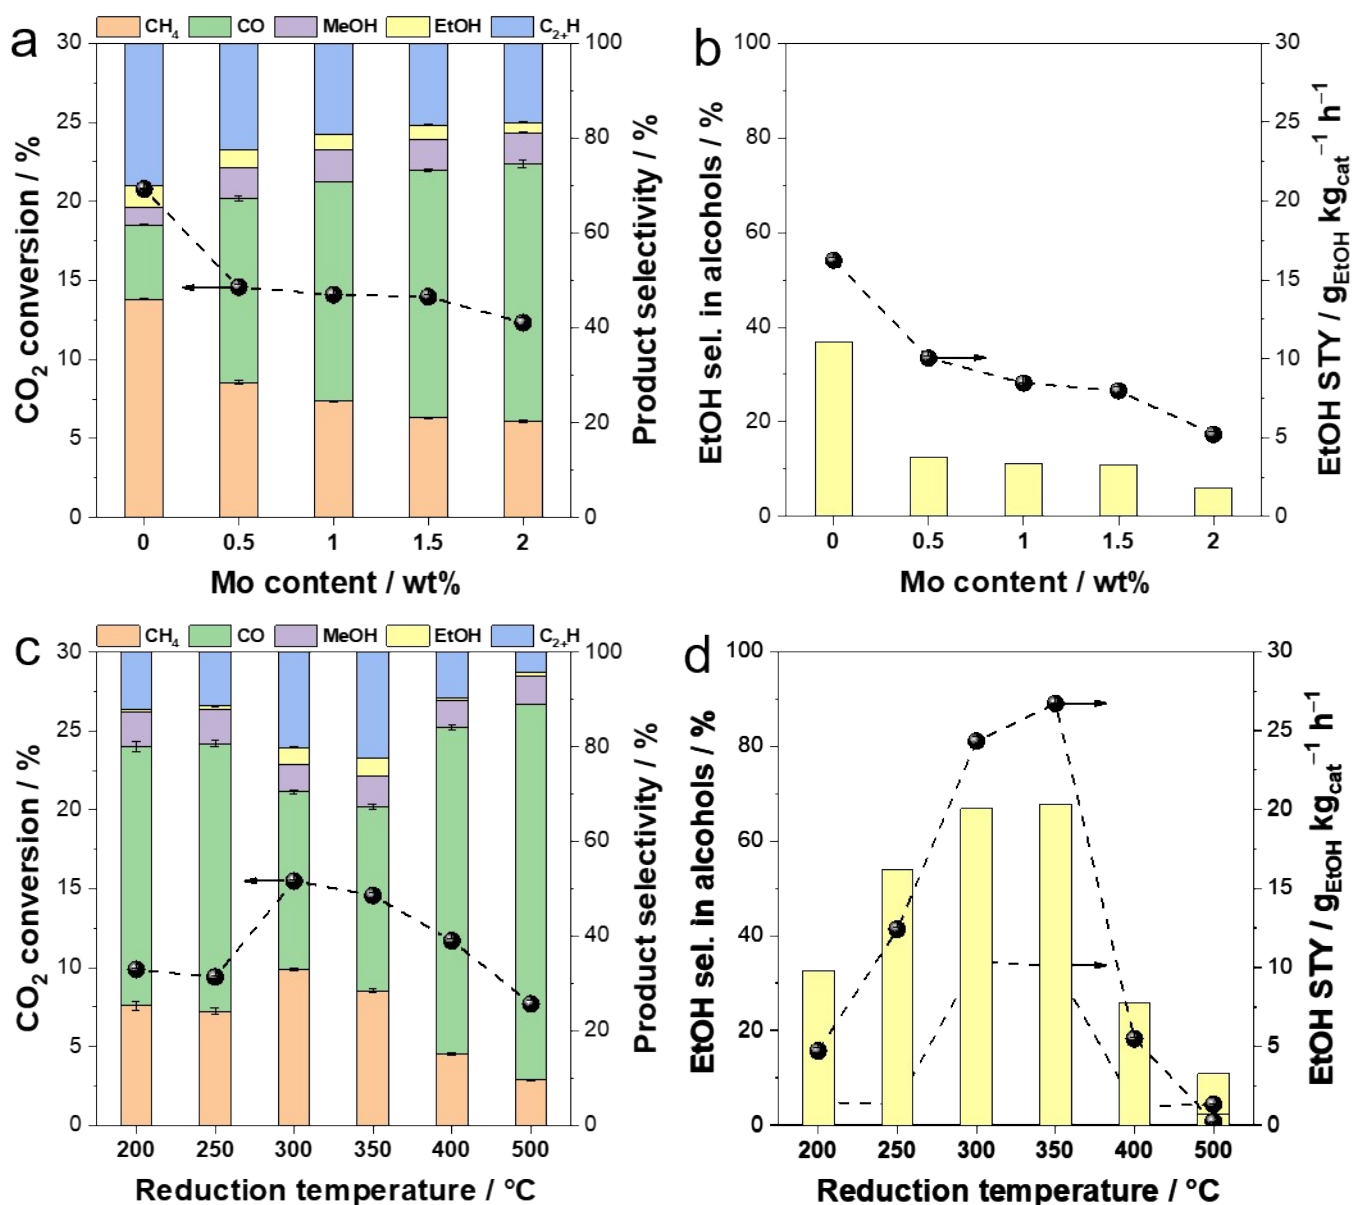

**Figure S3.** Catalytic performance of CO<sub>2</sub> hydrogenation over Te-CoFe catalysts. (a, b) effect of Co content: (a) CO<sub>2</sub> conversion and product selectivity; (b) alcohols selectivity in liquid products and corresponding ethanol STY. (c, d) effect of reduction temperature: (c) CO<sub>2</sub> conversion and product selectivity; (d) alcohols selectivity in liquid products and corresponding ethanol STY. (Experimental conditions: T = 300 °C, P = 5.0 MPa, H<sub>2</sub>/CO<sub>2</sub>/N<sub>2</sub> = 3:1:1, and GHSV=6000 mL g<sub>cat</sub><sup>-1</sup> h<sup>-1</sup>).

**Table S1.** Comparison of higher alcohols synthesis activity from CO<sub>2</sub> hydrogenation over 0.5Te-CoFe catalyst with some advanced catalysts in the literature.

| Catalyst                                          | T (°C) | P (MPa) | GHSV (mL g <sub>cat</sub> <sup>-1</sup> h <sup>-1</sup> ) | Selectivity (%) |                               |      |                |                | X <sub>CO2</sub> (%) | Ref       |
|---------------------------------------------------|--------|---------|-----------------------------------------------------------|-----------------|-------------------------------|------|----------------|----------------|----------------------|-----------|
|                                                   |        |         |                                                           | CO              | C <sub>x</sub> H <sub>y</sub> | ROH  | ROH            |                |                      |           |
|                                                   |        |         |                                                           |                 |                               |      | C <sub>1</sub> | C <sub>2</sub> |                      |           |
| Na-Co/SiO <sub>2</sub>                            | 250    | 5       | 4000                                                      | 29.1            | 61.4                          | 9.5  | 33.0           | 62.8           | 18.8                 | 1         |
| Na-Fe <sub>3</sub> O <sub>4</sub>                 | 320    | 3       | 8000                                                      | 14.3            | 81.7                          | 4.0  | -              | -              | 34.0                 | 2         |
| Fe-Co/K-Al <sub>2</sub> O <sub>3</sub>            | 340    | 2       | 9000                                                      | 10.4            | 89.6                          | -    | -              | -              | 36.6                 | 3         |
| 0.5MnFe                                           | 340    | 2       | -                                                         | 7.9             | 90.6                          | 1.5  | -              | -              | 10.0                 | 4         |
| RhFe-SiO <sub>2</sub>                             | 260    | 5       | -                                                         | 19.7            | 34.7                          | 45.6 | 64.8           | 35.2           | 26.7                 | 5         |
| Na <sub>1</sub> Mo <sub>12</sub> Fe <sub>87</sub> | 320    | 5       | 24000                                                     | 63.2            | 20.1                          | 16.7 | 79.6           | 20.4           | 10.7                 | 6         |
| 2%Na-Co <sub>2</sub> C/SiO <sub>2</sub>           | 250    | 5       | 6000                                                      | 26.3            | 61.2                          | 12.5 | 13.2           | 60.6           | 21.5                 | 7         |
| Cs-CuFeZn                                         | 330    | 5       | 4500                                                      | 20.7            | 54.2                          | 21.0 | 6.0            | 45.0           | 36.6                 | 8         |
| CuNaFe                                            | 310    | 3       | 28800                                                     | 17              | 65.2                          | ~10  | -              | -              | 32.3                 | 9         |
| FeCuGaZn-0.75                                     | 340    | 5       | 6000                                                      | 16.2            | 27.2                          | 31.9 | 2.0            | 25.4           | 26.0                 | 10        |
| 4.6K-CMZF                                         | 320    | 5       | 6000                                                      | 31.2            | 51.6                          | 17.2 | 10.3           | 77.3           | 30.4                 | 11        |
| 0.5Te-CoFe                                        | 260    | 5       | 6000                                                      | 21.2            | 68.0                          | 10.8 | 32.4           | 67.6           | 21.0                 | This work |
| 0.5Te-CoFe                                        | 280    | 5       | 6000                                                      | 27.8            | 62.6                          | 9.6  | 27.1           | 72.9           | 23.5                 | This work |
| 0.5Te-CoFe                                        | 300    | 5       | 6000                                                      | 29.6            | 62.8                          | 7.6  | 22.5           | 77.5           | 25.5                 | This work |
| 0.5Te-CoFe                                        | 320    | 5       | 6000                                                      | 25.6            | 67.9                          | 6.5  | 40.1           | 59.9           | 29.9                 | This work |
| 0.5Te-CoFe                                        | 340    | 5       | 6000                                                      | 20.1            | 77.1                          | 2.8  | 43.2           | 56.8           | 35.8                 | This work |

**Table S2.** Product distribution of a series of CoFe catalysts.

| Catalyst   | Selectivity (%) |      |                    |                                  |                   | X <sub>CO2</sub> (%) |
|------------|-----------------|------|--------------------|----------------------------------|-------------------|----------------------|
|            | CH <sub>4</sub> | CO   | CH <sub>3</sub> OH | C <sub>2</sub> H <sub>5</sub> OH | C <sub>2</sub> +H |                      |
| 10CoFe     | 39.7            | 23.1 | 4.5                | 4.7                              | 28.0              | 17.3                 |
| 20CoFe     | 46.1            | 15.6 | 3.6                | 4.8                              | 29.9              | 20.8                 |
| 30CoFe     | 51.4            | 11.2 | 3.7                | 3.0                              | 30.8              | 22.7                 |
| 40CoFe     | 50.2            | 11.2 | 3.6                | 2.4                              | 32.5              | 21.6                 |
| 50CoFe     | 48.9            | 18.3 | 4.3                | 1.9                              | 26.6              | 20.2                 |
| 0.5Te-CoFe | 46.0            | 21.2 | 3.5                | 7.3                              | 22.0              | 21.0                 |
| 1.0Te-CoFe | 50.4            | 23.4 | 4.4                | 5.4                              | 16.4              | 20.9                 |
| 1.5Te-CoFe | 32.9            | 52.8 | 5.7                | 1.7                              | 6.9               | 14.3                 |
| 2.0Te-CoFe | 20.3            | 69.3 | 9.3                | 0.6                              | 2.5               | 8.7                  |
| 0.5Mo-CoFe | 28.4            | 38.8 | 3.6                | 3.8                              | 22.4              | 14.6                 |
| 1.0Mo-CoFe | 24.5            | 46.3 | 6.5                | 3.2                              | 19.3              | 14.1                 |
| 1.5Mo-CoFe | 21.1            | 52.1 | 6.6                | 3.0                              | 17.2              | 14.0                 |
| 2.0Mo-CoFe | 20.3            | 54.3 | 6.6                | 2.2                              | 16.7              | 12.3                 |

**Table S3.** ICP-OES analysis of the actual metal loading of fresh catalysts.

| Catalyst   | Metal loading (wt.%) |      |     |     |
|------------|----------------------|------|-----|-----|
|            | Co                   | Fe   | Te  | Mo  |
| CoFe       | 11.3                 | 44.2 | -   | -   |
| 0.5Te-CoFe | 12.6                 | 41.1 | 0.5 | -   |
| 0.5Mo-CoFe | 11.8                 | 45.4 | -   | 0.5 |

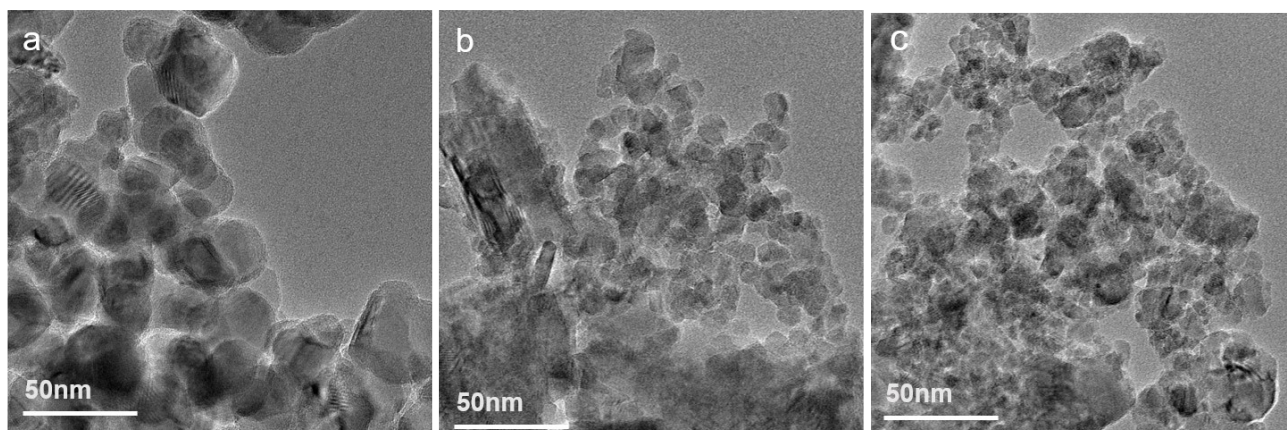

**Figure S4.** Low-magnification TEM images of the (a) 0.5Te-CoFe, (b) 0.5Mo-CoFe, and (c) CoFe catalysts.

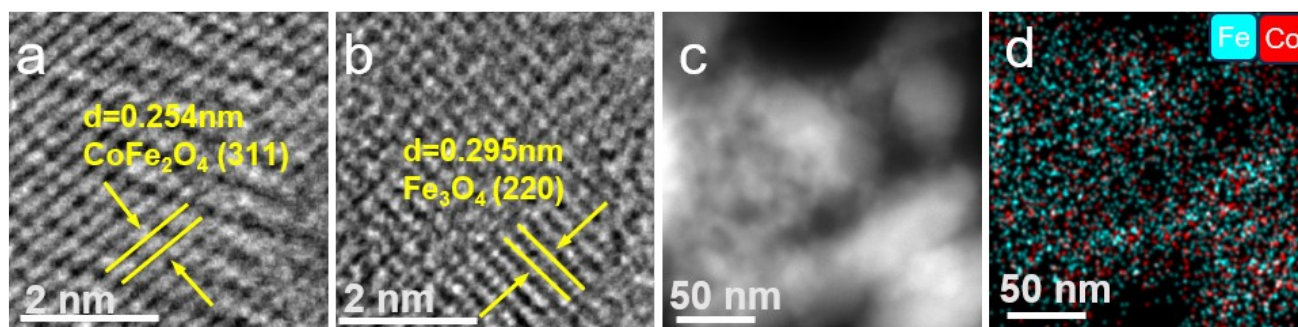

**Figure S5.** (a, b) HRTEM image, (c, d) HAADF and corresponding EDS mapping images of the CoFe catalyst.

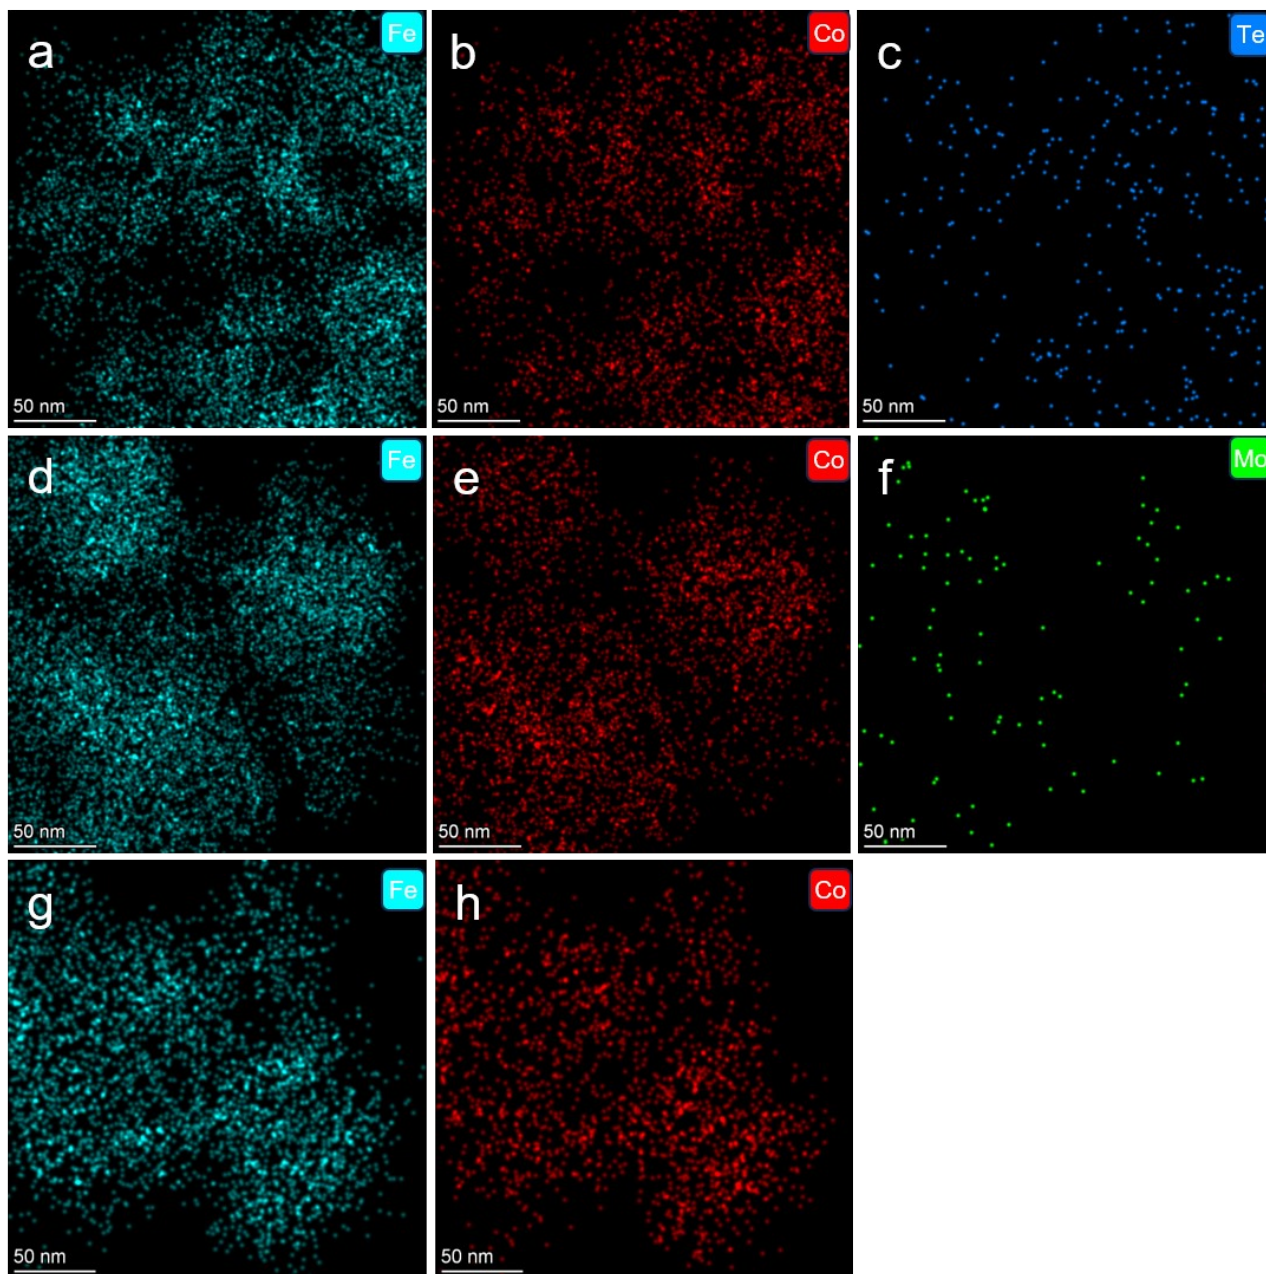

**Figure S6.** EDS-mapping spectra for (a-c) 0.5Te-CoFe, (d-f) 0.5Mo-CoFe and (g, h) CoFe catalyst.

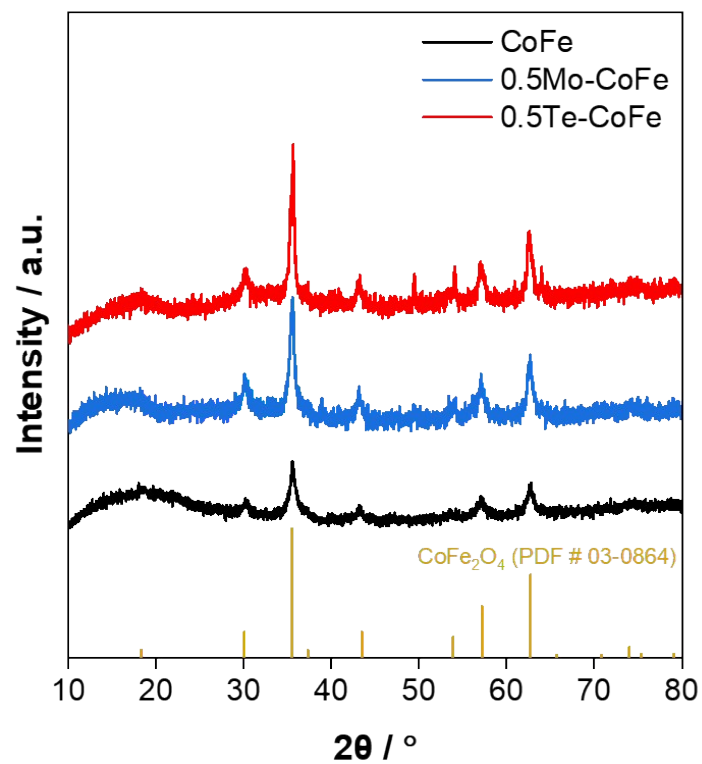

**Figure S7.** The XRD patterns of the CoFe, 0.5Te-CoFe and 0.5Mo-CoFe catalysts.

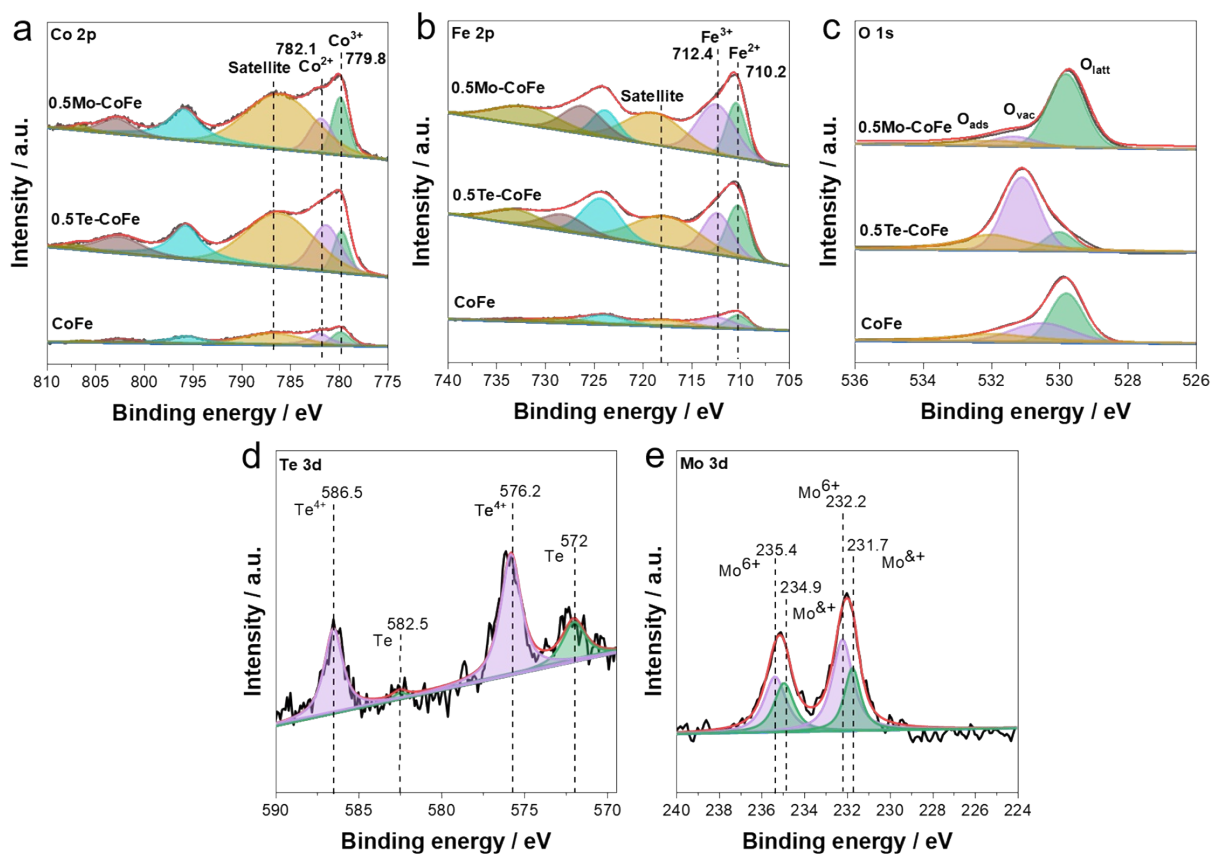

**Figure S8.** (a) Co 2p XPS spectra of reduced CoFe, 0.5Te-CoFe and 0.5Mo-CoFe catalysts, (b) Fe 2p XPS spectra of reduced CoFe, 0.5Te-CoFe and 0.5Mo-CoFe catalysts, (c) O 1s XPS spectra of reduced the catalysts (d) Te 3d XPS spectra of reduced 0.5Te-CoFe catalysts, (e) Mo 3d XPS spectra of reduced 0.5Mo-CoFe catalysts (Reduction conditions: 350 °C and 50 mL min<sup>-1</sup> H<sub>2</sub> flow for 1 h).

**Table S4.** Co<sup>2+</sup> and Co<sup>3+</sup> intensity ratio in the Co 2p spectra of a series of CoFe Catalysts.

| Catalyst   | Co <sup>2+</sup> | Co <sup>3+</sup> | Co <sup>2+</sup> / (Co <sup>2+</sup> +Co <sup>3+</sup> ) | Co <sup>3+</sup> / (Co <sup>2+</sup> +Co <sup>3+</sup> ) |
|------------|------------------|------------------|----------------------------------------------------------|----------------------------------------------------------|
| CoFe       | 19014.8          | 20243.2          | 0.49                                                     | 0.51                                                     |
| 0.5Te-CoFe | 100444.6         | 45281.2          | 0.69                                                     | 0.31                                                     |
| 0.5Mo-CoFe | 54925.9          | 79367.2          | 0.41                                                     | 0.59                                                     |

**Table S5.** Fe<sup>2+</sup> and Fe<sup>3+</sup> intensity ratio in the Fe 2p spectra of a series of CoFe Catalysts.

| Catalyst   | Fe <sup>2+</sup> | Fe <sup>3+</sup> | Fe <sup>2+</sup> / (Fe <sup>2+</sup> +Fe <sup>3+</sup> ) | Fe <sup>3+</sup> / (Fe <sup>2+</sup> +Fe <sup>3+</sup> ) |
|------------|------------------|------------------|----------------------------------------------------------|----------------------------------------------------------|
| CoFe       | 50733.6          | 74155.6          | 0.41                                                     | 0.59                                                     |
| 0.5Te-CoFe | 211268.8         | 214050.4         | 0.50                                                     | 0.50                                                     |
| 0.5Mo-CoFe | 187882.6         | 336574.9         | 0.36                                                     | 0.64                                                     |

**Table S6.**  $O_{\text{latt}}$ ,  $O_{\text{vac}}$  and  $O_{\text{ads}}$  intensity ratio in the O 1s spectra of a series of CoFe Catalysts.

| Catalyst   | $O_{\text{latt}}$ | $O_{\text{vac}}$ | $O_{\text{ads}}$ | $\frac{O_{\text{latt}}}{(O_{\text{latt}} + O_{\text{vac}} + O_{\text{ads}})}$ | $\frac{O_{\text{vac}}}{(O_{\text{latt}} + O_{\text{vac}} + O_{\text{ads}})}$ | $\frac{O_{\text{ads}}}{(O_{\text{latt}} + O_{\text{vac}} + O_{\text{ads}})}$ |
|------------|-------------------|------------------|------------------|-------------------------------------------------------------------------------|------------------------------------------------------------------------------|------------------------------------------------------------------------------|
| CoFe       | 217614.9          | 154830.7         | 132869.7         | 0.43                                                                          | 0.31                                                                         | 0.26                                                                         |
| 0.5Te-CoFe | 73126.13          | 353256.3         | 201243.3         | 0.12                                                                          | 0.56                                                                         | 0.32                                                                         |
| 0.5Mo-CoFe | 359713.4          | 57371.91         | 60303.92         | 0.75                                                                          | 0.12                                                                         | 0.13                                                                         |

**Table S7.** Surface atomic fraction of Te/Mo relative to total metals.

| Catalyst   | Promoter<br>Te/Mo | Co       | Fe       | Surface atomic<br>fraction (XPS,<br>at%) | Bulk atomic<br>fraction (ICP, at%) | Enrichment factor<br>(surface/bulk) |
|------------|-------------------|----------|----------|------------------------------------------|------------------------------------|-------------------------------------|
| 0.5Te-CoFe | 3136.7            | 145725.8 | 425319.2 | 0.54                                     | 0.48                               | 1.13                                |
| 0.5Mo-CoFe | 3384.4            | 134211.3 | 524457.5 | 0.51                                     | 0.51                               | 1.00                                |

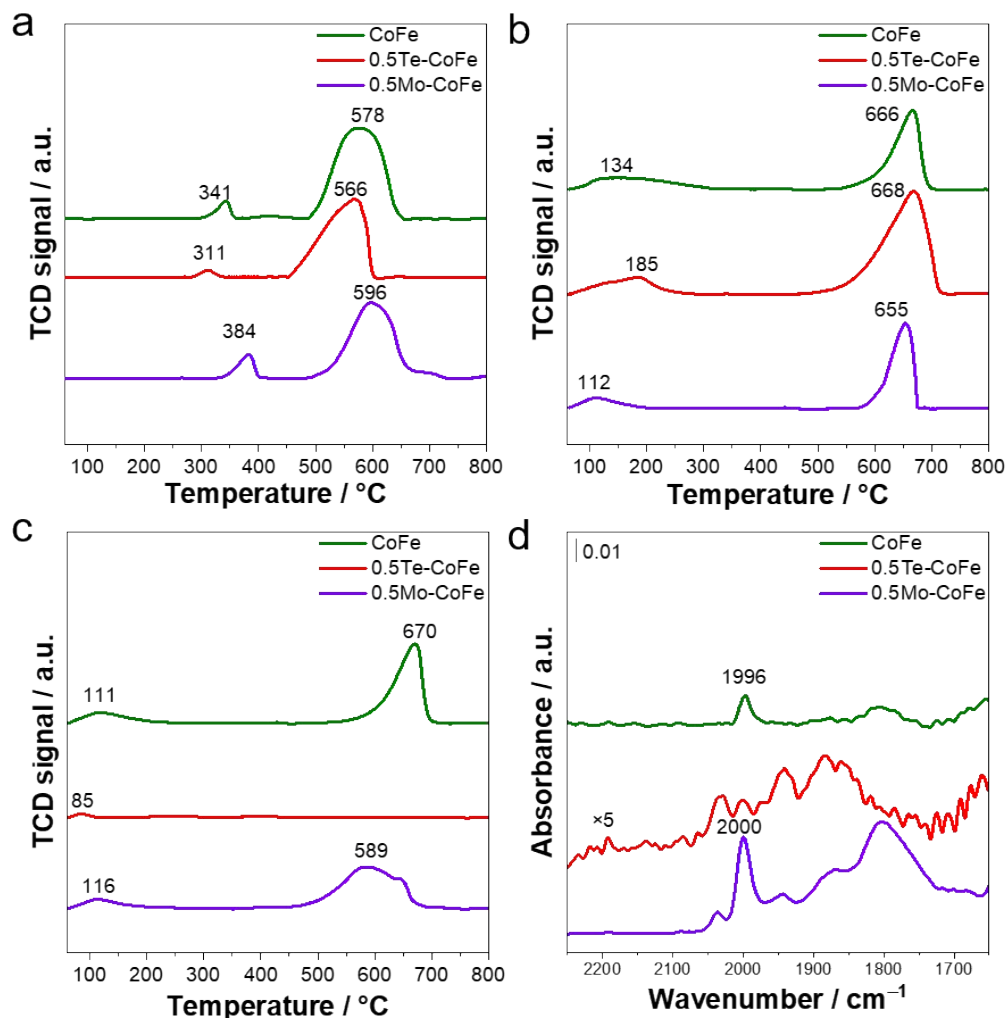

**Figure S9.** (a) H<sub>2</sub>-TPR, (b) CO<sub>2</sub>-TPD and (c) CO-TPD profiles of the catalysts and (d) *In situ* DRIFTS spectra of CO desorption profiles of the catalysts. (Reduction conditions: 350 °C and 50 mL min<sup>-1</sup> H<sub>2</sub> flow for 1 h).

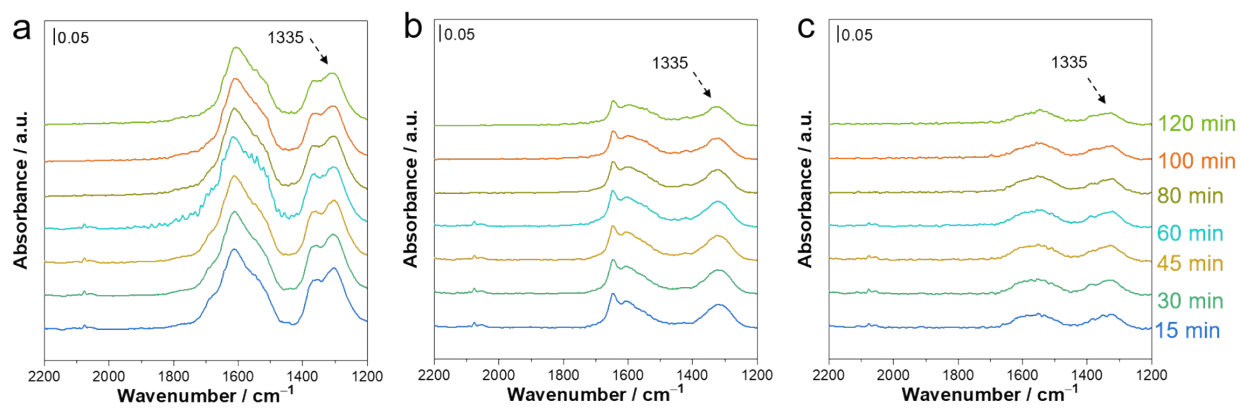

**Figure S10.** *In situ* CO<sub>2</sub> DRIFTS spectra of the catalysts. (a) 0.5Te-CoFe, (b) CoFe and (c) 0.5Mo-CoFe. (Reduction conditions: 350 °C and 50 mL min<sup>-1</sup> H<sub>2</sub> flow for 1 h. Subsequently, the catalyst was exposed to CO<sub>2</sub> for 60 min, followed by switching to Ar for another 60 min).

**Table S8.** H<sub>2</sub> consumption amount of the prepared catalysts.

| Catalyst   | H <sub>2</sub> consumption amount<br>/ mmol g <sub>cat</sub> <sup>-1</sup> | H <sub>2</sub> consumption amount<br>/ mmol g <sub>cat</sub> <sup>-1</sup> |
|------------|----------------------------------------------------------------------------|----------------------------------------------------------------------------|
| CoFe       | 0.02                                                                       | 0.34                                                                       |
| 0.5Te-CoFe | 0.02                                                                       | 0.35                                                                       |
| 0.5Mo-CoFe | 0.05                                                                       | 0.30                                                                       |

**Table S9.** CO<sub>2</sub> adsorption amount of the prepared catalysts.

| Catalyst   | Weak adsorption amount<br>/ mmol g <sub>cat</sub> <sup>-1</sup> | Strong adsorption amount<br>/ mmol g <sub>cat</sub> <sup>-1</sup> |
|------------|-----------------------------------------------------------------|-------------------------------------------------------------------|
| CoFe       | 0.42                                                            | 1.21                                                              |
| 0.5Te-CoFe | 0.40                                                            | 1.46                                                              |
| 0.5Mo-CoFe | 0.18                                                            | 1.11                                                              |

**Table S10.** CO adsorption amount of the prepared catalysts.

| Catalyst   | CO adsorption amount<br>/ mmol g <sub>cat</sub> <sup>-1</sup> | CO adsorption amount<br>/ mmol g <sub>cat</sub> <sup>-1</sup> |
|------------|---------------------------------------------------------------|---------------------------------------------------------------|
| CoFe       | 0.09                                                          | 0.48                                                          |
| 0.5Te-CoFe | 0.12                                                          | 0.03                                                          |
| 0.5Mo-CoFe | 0.06                                                          | 0.55                                                          |

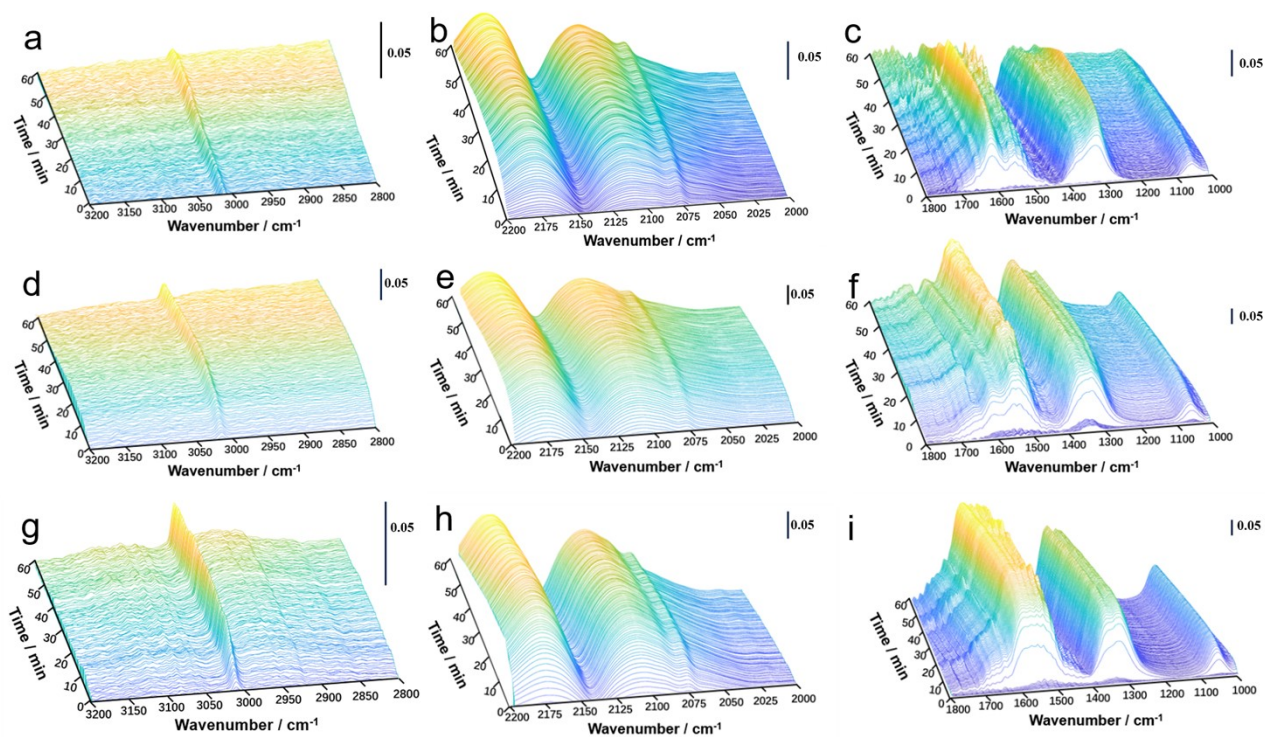

**Figure S11.** *In situ* DRIFTS spectra of (a-c) CoFe, (d-f) 0.5Mo-CoFe and (g-i) 0.5Te-CoFe under reaction condition for 60 minutes (Reduction conditions: 300 °C, 0.3 MPa, 10% H<sub>2</sub>/Ar, 50 mL/min, 1h. Test condition: 300 °C, 3 MPa, 10% CO<sub>2</sub> / 10% Ar /30% H<sub>2</sub>).

## References

1. S. Zhang, X. Liu, Z. Shao, H. Wang and Y. Sun, *J. Catal.*, 2020, **382**, 86-96.
2. S. Kattel, P. Liu and J. G. Chen, *J. Am. Chem. Soc.*, 2017, **139**, 9739-9754.
3. T. Numpilai, N. Chanlek, Y. Poo-Arporn, C. K. Cheng, N. Siri-Nguan, T. Sornchamni, M. Chareonpanich, P. Kongkachuichay, N. Yigit, G. Rupprechter, J. Limtrakul and T. Witoon, *ChemCatChem.*, 2020, **12**, 3306-3320.
4. M. Al-Dossary, A. A. Ismail, J. L. G. Fierro, H. Bouzid and S. A. Al-Sayari, *Appl. Catal., B.*, 2015, **165**, 651-660.
5. D. Xu, Y. Wang, M. Ding, X. Hong, G. Liu and S. C. E. Tsang, *Chem.*, 2021, **7**, 849-881.
6. Y. Ge, A. J. Martín, M. Suvarna, T. Zou, F. Krumeich and J. Pérez-Ramírez, *Appl. Catal., B.*, 2025, **378**, 125578.
7. S. Zhang, Z. Wu, X. Liu, Z. Shao, L. Xia, L. Zhong, H. Wang and Y. Sun, *Appl. Catal., B.*, 2021, **293**, 120207.
8. D. Xu, M. Ding, X. Hong, G. Liu and S. C. E. Tsang, *ACS Catal.*, 2020, **10**, 5250-5260.
9. Z. Si, L. Wang, Y. Han, J. Yu, Q. Ge, C. Zeng and J. Sun, *ACS Sustainable Chem. Eng.*, 2022, **10**, 14972-14979.
10. Y. Ma, Y. Liu, Z. Huang, X. Han, L. Ye, X. Qin, H. Xu, L. Kong, J. Li and J. Zhang, *Sep. Purif. Technol.*, 2025, **364**, 132583.
11. D. Xu, M. Ding, X. Hong and G. Liu, *ACS Catal.*, 2020, **10**, 14516-14526.
